# Supplementary material for: Defining the combined stress response in wild Arachis
Source: PubMed Central journal article supplement (PMC8160017; doi:10.1038/s41598-021-90607-7), 2021-05-27
Supplement: 41598_2021_90607_MOESM1_ESM.pdf [file 41598_2021_90607_MOESM1_ESM.pdf]

## Supplementary Files

### Defining the combined stress response in wild *Arachis*

Ana Paula Zotta Mota<sup>a,b,c,1,2</sup>, Ana Cristina Miranda Brasileiro<sup>a,c</sup>, Bruna Vidigal<sup>a,c</sup>, Thais Nicolini Oliveira<sup>a,c</sup>, Andressa da Cunha Quintana Martins<sup>a,c</sup>, Mario Alfredo Passos Saraiva<sup>a,c</sup>, Ana Claudia Guerra de Araújo<sup>a,c</sup>, Roberto C. Togawa<sup>a,c</sup>, Maria Fatima Grossi-de-Sá<sup>a,c,d</sup>, Patricia Messenberg Guimaraes<sup>a,c</sup>

**Supplementary Figure S1:** Relative quantification of *AsECH1* expression in four *A. thaliana* OE lines using *AtACT* and *AtEF1 $\alpha$*  reference genes as normalizers.

**Supplementary Figure S2:** Dry-down and nematode assays of four *A. thaliana* *AsECH1*-OE lines (OE1, OE2, OE6 and OE7) and WT plants. a) Control (CTR) and drought stressed plants (STR) submitted to dry-down assay in the first and last (9<sup>th</sup>) days of the experiment. Relative Water Content (RWC) and electrolytic leakage (EE) percentage at the 9<sup>th</sup> day of drought imposition. b) Average number of *M. incognita* females per gram of *A. thaliana* root. Values are mean of 15 individuals and significant differences between WT and OE lines are marked with an asterisk.

**Supplementary Figure S3:** Flowchart of the analyses used for meta-analysis. *A. stenosperma* inoculated with nematode at 3DAI, 6DAI and 9DAI (SN3, SN6, SN9), *A. stenosperma* submitted to dehydration (SDHY) and dry-down (SDD). *A. duranensis* inoculated with nematode at 3DAI, 6DAI and 9DAI (DN3, DN6, DN9), *A. duranensis* submitted to dehydration (DDHY) and dry-down (DDD).

**Supplementary Table S1:** *Arachis* spp. libraries (RNA-Seq) used in the meta-analysis and their NCBI accession numbers.

**Supplementary Table S2:** A-metaDEGs and the expression values in both *A. stenosperma* and *A. duranensis*, for both dry-down and dehydration assays. DDHY: *A. duranensis* submitted to dehydration, SDHY: *A. stenosperma* submitted to dehydration, DDD: *A. duranensis* submitted to dry-down, SDD: *A. stenosperma* submitted to dry-down.

**Supplementary Table S3:** B-metaDEGs and the expression values in both *A. stenosperma* and *A. duranensis*, in 3 days after inoculation (SN3 and DN3), 6 days after inoculation (SN6 and DN6) and 9 days after inoculation (SN9 and DN9).

**Supplementary Table S4:** crossDEGs of *A. stenosperma* and their expression values in Log2FC.

**Supplementary Table S5:** Illumina HiSeq 4000 sequencing data from *A. stenosperma* quantified in the *A. duranensis* reference genome.

**Supplementary Table S6:** Commonly regulated genes between core-metaDEGs and *de facto* combined stress libraries.

**Supplementary Table S7:** Primer sequences used for qRT-PCR analysis in this study.

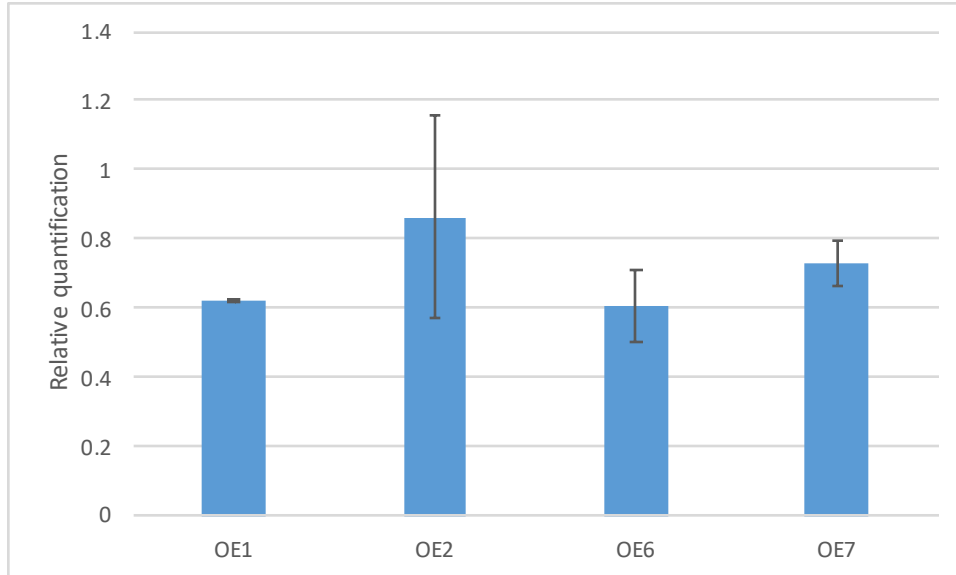

**Supplementary Figure S1:** Relative quantification of *AsECH1* expression in four *A. thaliana* OE lines using *AtACT* and *AtEF1 $\alpha$*  reference genes as normalizers.

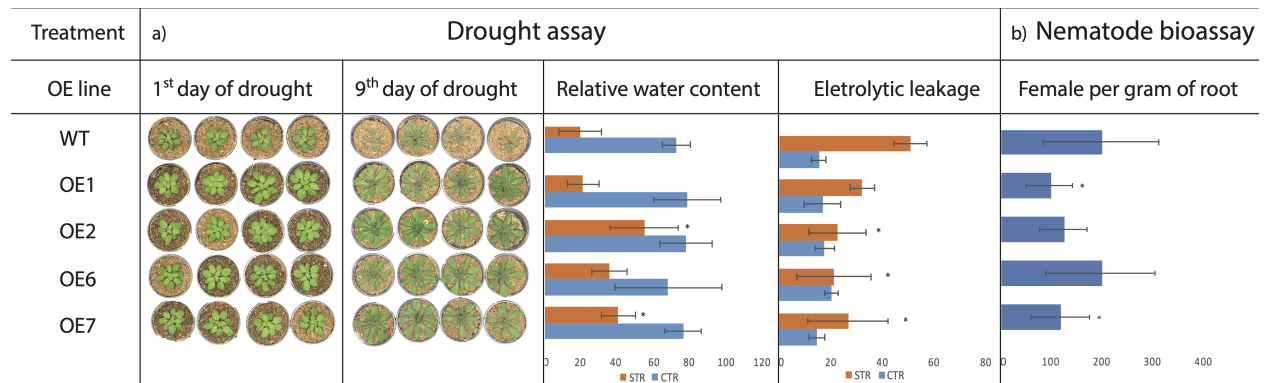

**Supplementary Figure S2:** Dry-down and nematode assays of four *A. thaliana* *AsECHI*-OE lines (OE1, OE2, OE6 and OE7) and WT plants. a) Control (CTR) and drought stressed plants (STR) submitted to dry-down assay in the first and last (9<sup>th</sup>) days of the experiment. Relative Water Content (RWC) and electrolytic leakage (EE) percentage at the 9<sup>th</sup> day of drought imposition. b) Average number of *M. incognita* females per gram of *A. thaliana* root. Values are mean of 15 individuals and significant differences between WT and OE lines are marked with an asterisk.

**Supplementary Figure S3:** Flowchart of the analyses used for meta-analysis. *A. stenosperma* inoculated with nematode at 3DAI, 6DAI and 9DAI (SN3, SN6, SN9), *A. stenosperma* submitted to dehydration (SDHY) and dry-down (SDD). *A. duranensis* inoculated with nematode at 3DAI, 6DAI and 9DAI (DN3, DN6, DN9), *A. duranensis* submitted to dehydration (DDHY) and dry-down (DDD).

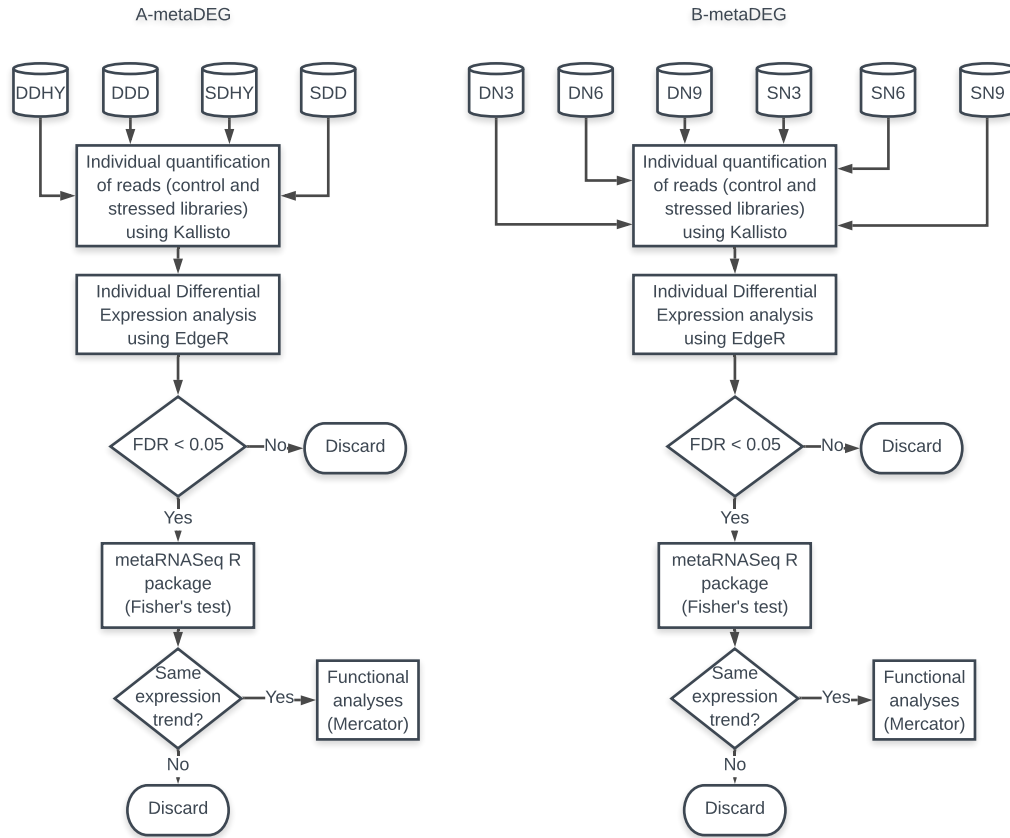

**Supplementary Table S1:** *Arachis* spp. libraries (RNA-Seq) used in the meta-analysis and their NCBI accession numbers.

| Accession number | Specie                     | Stress                                  | Tissue | Time-point          | Total reads | Reference              |
|------------------|----------------------------|-----------------------------------------|--------|---------------------|-------------|------------------------|
| SAMN03734821     | <i>Arachis stenosperma</i> | <i>Meloidogyne arenaria</i> inoculation | Roots  | 0 DAI (control)     | 6,651,071   | Guimaraes et al., 2015 |
| SAMN03734822     | <i>Arachis stenosperma</i> | <i>Meloidogyne arenaria</i> inoculation | Roots  | 3 DAI               | 7,162,500   | Guimaraes et al., 2015 |
| SAMN03734823     | <i>Arachis stenosperma</i> | <i>Meloidogyne arenaria</i> inoculation | Roots  | 6 DAI               | 6,333,182   | Guimaraes et al., 2015 |
| SAMN03734824     | <i>Arachis stenosperma</i> | <i>Meloidogyne arenaria</i> inoculation | Roots  | 9 DAI               | 6,202,969   | Guimaraes et al., 2015 |
| SAMN08225801     | <i>Arachis stenosperma</i> | Drought (Dehydration)                   | Roots  | 0 minutes (control) | 12,219,081  | Vinson et al., 2018    |
| SAMN08225802     | <i>Arachis stenosperma</i> | Drought (Dehydration)                   | Roots  | 25 - 150 minutes    | 12,587,737  | Vinson et al., 2018    |
| To be submitted  | <i>Arachis stenosperma</i> | Drought (Dry-down)                      | Roots  | 0 DAI (control)     | 100,326,990 | This study             |
| To be submitted  | <i>Arachis stenosperma</i> | Drought (Dry-down)                      | Roots  | 7 DAI               | 112,787,062 | This study             |
| SAMN08225796     | <i>Arachis duranensis</i>  | <i>Meloidogyne arenaria</i> inoculation | Roots  | 0 DAI (control)     | 66,932,681  | Mota et al., 2018      |
| SAMN08225797     | <i>Arachis duranensis</i>  | <i>Meloidogyne arenaria</i> inoculation | Roots  | 3 DAI               | 65,043,113  | Mota et al., 2018      |
| SAMN08225798     | <i>Arachis duranensis</i>  | <i>Meloidogyne arenaria</i> inoculation | Roots  | 6 DAI               | 64,288,593  | Mota et al., 2018      |
| SAMN08225799     | <i>Arachis duranensis</i>  | <i>Meloidogyne arenaria</i> inoculation | Roots  | 9 DAI               | 60,877,309  | Mota et al., 2018      |
| SAMN08225788     | <i>Arachis duranensis</i>  | Drought (Dehydration)                   | Roots  | 0 minutes (control) | 9,085,802   | Vinson et al., 2018    |
| SAMN08225800     | <i>Arachis duranensis</i>  | Drought (Dehydration)                   | Roots  | 25 - 150 minutes    | 8,453,190   | Vinson et al., 2018    |
| To be submitted  | <i>Arachis duranensis</i>  | Drought (Dry-down)                      | Roots  | 0 DAI (control)     | 134,098,748 | This study             |
| To be submitted  | <i>Arachis duranensis</i>  | Drought (Dry-down)                      | Roots  | 7 DAI               | 123,371,298 | This study             |

**Supplementary Table S5:** Illumina HiSeq 4000 sequencing data from *A. stenosperma* quantified in the *A. duranensis* reference genome.

|             |                                               | <b>Nematode</b> | <b>Drought</b> | <b>Combined</b> | <b>Control</b> |
|-------------|-----------------------------------------------|-----------------|----------------|-----------------|----------------|
| Replicate 1 | Number of raw reads                           | 34,173,582      | 35,004,558     | 37,568,042      | 29,324,662     |
|             | Number of reads after trimming                | 30,028,088      | 31,823,728     | 33,512,716      | 26,572,592     |
|             | Number of quantified reads into the reference | 10,631,810      | 9,189,171      | 10,385,619      | 8,469,816      |
|             | Total number of gene models                   | 25,446          | 24,848         | 25,386          | 25,943         |
| Replicate 2 | Number of raw reads                           | 34,236,660      | 37,275,858     | 33,190,158      | 36,116,360     |
|             | Number of reads after trimming                | 31,699,592      | 33,061,206     | 30,115,720      | 31,430,734     |
|             | Number of quantified reads into the reference | 11,653,431      | 9,679,977      | 8,651,041       | 9,593,936      |
|             | Total number of gene models                   | 25,715          | 25,266         | 25,227          | 24,825         |
| Replicate 3 | Number of raw reads                           | 31,200,332      | 40,506,646     | 36,428,454      | 34,885,968     |
|             | Number of reads after trimming                | 29,136,428      | 37,119,422     | 31,889,266      | 30,148,320     |
|             | Number of quantified reads into the reference | 10,650,358      | 10,935,791     | 9,641,333       | 8,735,584      |
|             | Total number of gene models                   | 25,330          | 25,695         | 24,986          | 24,998         |
| DEGs        | Number of genes with FDR < 0.05               | 1,251           | 6,102          | 3,345           | N/A            |

**Supplementary Table S7:** Primer sequences used for qRT-PCR analysis in this study.

| Primer name     | Species target        | Description                                              | Sequence 5' 3'                                    | Reference              |
|-----------------|-----------------------|----------------------------------------------------------|---------------------------------------------------|------------------------|
| AtACT2          | <i>A. thaliana</i>    | Reference gene Actin 2 of <i>A. thaliana</i>             | CTTGACCAAGCAGCATGAA<br>CCGATCCAGACACTGTACTTCCTT   | Czechowski et al. 2005 |
| AtEF-1 $\alpha$ | <i>A. thaliana</i>    | Reference gene Elongation Factor1 of <i>A. thaliana</i>  | TGAGCAGCTCTTCTTGCTTTCA<br>GGTGGTGGCATCCATCTTGTACA | Czechowski et al. 2005 |
| AsECH1 (Cht2)   | <i>A. thaliana</i>    | <i>A. stenosperra</i> endochitinase                      | GCCCATGGCTTCTACACCTA<br>CCCCATTCAAATTCATCTGG      | Carmo et al. 2019      |
| 60S             | <i>A. stenosperra</i> | Reference gene 60S of <i>A. stenosperra</i>              | CAACAACGGAGACATCAACG<br>ATCACTGCCACCCAGAAAAC      | Morgante et al., 2011  |
| GAPDH           | <i>A. stenosperra</i> | Reference gene GAPDH of <i>A. stenosperra</i>            | TGGAGTGAGAGGTGCATTG<br>TCTTTTGACGACCAGGGAAC       | Morgante et al., 2011  |
| AsERF2          | <i>A. stenosperra</i> | Markers gene from ERF2 pathway of <i>A. stenosperra</i>  | AGAGGAGGGGCCAAATAAGA<br>CAGCAGTGCAAAGGTTCCA       | This study             |
| AsbZIP          | <i>A. stenosperra</i> | Marker gene from bZIP pathway of <i>A. stenosperra</i>   | TGATGCAGCAGTTCCTGTTC<br>GCTGCACATTTTCGTCTGAA      | This study             |
| AsVSP2          | <i>A. stenosperra</i> | Marker gene from VSP2 pathway of <i>A. stenosperra</i>   | AGCACCTCCACTTCCAGAGA<br>GGACTGTGGCCTTCCAGTTA      | This study             |
| AsRD29B         | <i>A. stenosperra</i> | Marker gene from RD29B pathway of <i>A. stenosperra</i>  | GAACGAGACTTGCCAGAGCT<br>TGTGGCTGCTGGTACTTGAG      | This study             |
| AsPDF1.2        | <i>A. stenosperra</i> | Marker gene from PDF1.1 pathway of <i>A. stenosperra</i> | TGCGACGACCACTGCAAGAACA<br>TTTCTGGTGACCAACAGCGGA   | This study             |
| AsLOX3          | <i>A. stenosperra</i> | Marker gene from LOX3 pathway of <i>A. stenosperra</i>   | AGAAAGACGAGCCATGGTG<br>TAGGATGAAACCGCCGTACG       | This study             |
